# Supplementary material for: Nanomaterial-based regulation of redox metabolism for enhancing cancer therapy
Source: Royal Society of Chemistry journal article supplement (doi:10.1039/d4cs00404c), 2024-01-01
Supplement: d4cs00404c1.pdf [file d4cs00404c1.pdf]

## Supplementary Information

**Table S1 Approved nanomedicine for tumor therapy**

| Type of<br>Nanomaterials     | Trade<br>Name | Therapeutic<br>type | Active<br>Ingredients          | Nanocarrier            | Administration<br>route | Indications                                                                                        | Approval<br>date |
|------------------------------|---------------|---------------------|--------------------------------|------------------------|-------------------------|----------------------------------------------------------------------------------------------------|------------------|
| Lipid-based<br>nanomaterials | Doxil/Caelyx  | Chemotherapy        | Doxorubicin                    | PEGylated<br>liposomes | iv.                     | Kaposi sarcoma,<br>breast cancer,<br>ovarian cancer,<br>multiple myeloma                           | 1995             |
| □                            | DaunoXome     | Chemotherapy        | Daunorubicin                   | Liposomes              | iv.                     | Kaposi sarcoma                                                                                     | 1996             |
| □                            | DepoCyt       | Chemotherapy        | Cytarabine                     | Liposomes              | iv.                     | Lymphomatous<br>meningitis                                                                         | 1999             |
| □                            | Myocet        | Chemotherapy        | Doxorubicin<br>hydrochloride   | Liposomes              | iv.                     | Breast cancer                                                                                      | 2000             |
| □                            | Lipusu        | Chemotherapy        | Paclitaxel                     | Liposomes              | iv.                     | Ovarian cancer,<br>non-small-cell<br>lung cancer,<br>breast<br>cancer,metastatic<br>gastric cancer | 2003             |
| □                            | Mepact        | Chemotherapy        | Mifamurtide                    | Liposomes              | iv.                     | Osteogenic<br>sarcoma                                                                              | 2009             |
| □                            | Ameluz        | Chemotherapy        | 5-aminolevulinic<br>acid       | Liposomes              | it.                     | Nodular basal cell<br>carcinoma                                                                    | 2011             |
| □                            | Marqibo       | Chemotherapy        | Vincristine sulfate            | Liposomes              | iv.                     | Lymphoblastic<br>leukemia                                                                          | 2012             |
| □                            | Lipodox       | Chemotherapy        | Doxorubicin<br>hydrochloride   | Liposome               | iv.                     | Kaposi's sarcoma,<br>ovarian cancer,<br>multiple<br>myeloma,<br>metastatic<br>pancreatic cancer    | 2013             |
| □                            | Onivyde       | Chemotherapy        | Irinotecan                     | PEGylated<br>liposomes | iv.                     | Metastatic<br>pancreatic cancer                                                                    | 2015             |
| □                            | DHP107        | Chemotherapy        | Paclitaxel                     | Lipid<br>nanoparticles | po.                     | Advanced gastric<br>cancer                                                                         | 2016             |
| □                            | Vyxeos        | Chemotherapy        | Cytarabine and<br>daunorubicin | Liposomes              | iv.                     | Acute myeloid<br>leukemia                                                                          | 2017             |

|                                        |                  |              |                        |                        |     |                                                                                                                                       |      |
|----------------------------------------|------------------|--------------|------------------------|------------------------|-----|---------------------------------------------------------------------------------------------------------------------------------------|------|
| □                                      | LipoplatinT<br>M | Chemotherapy | Cisplatin              | Liposomes              | iv. | Pancreatic cancer,<br>lung cancer                                                                                                     | 2018 |
| <b>Polymer-based<br/>nanomaterials</b> | SMANCS           | Chemotherapy | Neocarzinostatin       | Polymeric<br>conjugate | ia. | Hepatocellular<br>carcinoma                                                                                                           | 1993 |
| □                                      | Oncaspar         | Chemotherapy | Pegaspargase           | Polymeric<br>micelles  | iv. | Acute<br>lymphoblastic<br>leukemia,chronic<br>myelogenous<br>leukemia                                                                 | 1994 |
| □                                      | Genexol-<br>PM   | Chemotherapy | Paclitaxel             | Polymeric<br>micelles  | iv. | Breast cancer,<br>small cell lung<br>cancer                                                                                           | 2007 |
| □                                      | Eligard          | Chemotherapy | Leuprolide<br>acetate  | Polymeric<br>micelles  | iv. | Prostate cancer                                                                                                                       | 2002 |
| □                                      | Nanoxel          | Chemotherapy | Paclitaxel             | Polymeric<br>micelles  | iv. | Breast cancer,<br>ovarian cancer                                                                                                      | 2007 |
| □                                      | DocetaxelP<br>M  | Chemotherapy | Docetaxel              | Polymeric<br>micelles  | iv. | Breast cancer,<br>gastric cancer,<br>non-small-cell<br>lung cancer,<br>ovarian cancer,<br>prostate cancer,<br>squamous cell<br>cancer | 2013 |
| □                                      | Paclical         | Chemotherapy | Paclitaxel             | Polymeric<br>micelles  | iv. | Pancreatic cancer,<br>metastatic breast<br>cancer, ovarian<br>cancer                                                                  | 2015 |
| □                                      | Apealea          | Chemotherapy | Paclitaxel             | Polymeric<br>micelles  | iv. | Ovarian cancer,<br>peritoneal cancer,<br>fallopian tube<br>cancer                                                                     | 2018 |
| <b>Protein-based<br/>Nanomaterials</b> | Ontak            | Chemotherapy | Denileukin<br>Diftitox | Protein                | iv. | Cutaneous T-cell<br>lymphoma,<br>leukemia                                                                                             | 1999 |
| □                                      | Abraxane         | Chemotherapy | Paclitaxel             | Albumin                | iv. | Breast cancer,<br>non-metastatic<br>small cell lung<br>cancer, metastatic<br>pancreatic<br>adenocarcinoma                             | 2005 |

|                                |           |                       |            |                             |         |                                                                                    |      |
|--------------------------------|-----------|-----------------------|------------|-----------------------------|---------|------------------------------------------------------------------------------------|------|
| <input type="checkbox"/>       | Pazenir   | Chemotherapy          | Paclitaxel | Albumin                     | iv.     | Metastatic breast cancer, metastatic pancreatic cancer, non-small cell lung cancer | 2019 |
| <input type="checkbox"/>       | Fyarro    | Chemotherapy          | Sirolimus  | Albumin                     | iv.     | Malignant perivascular epithelioid cell tumor                                      | 2021 |
| <b>Inorganic Nanomaterials</b> | NanoTherm | Hyperthermia          | /          | Iron oxide nanoparticles    | iv./it. | Glioblastoma, prostate cancer, pancreatic cancer.                                  | 2010 |
| <input type="checkbox"/>       | Hensify   | Radiotherapy enhancer | /          | Hafnium oxide nanoparticles | it.     | Locally advanced soft tissue sarcoma                                               | 2019 |

iv. intravenous injection

ia. intraarterial injection

it. intratumoral injection

**Table S2 Representative nanomaterials for regulating redox metabolism in cancer cells**

| Classification                                       | Nanomaterials                                        | Targets                                    | Therapeutic type                                                        | Indications                                                | Ref. |
|------------------------------------------------------|------------------------------------------------------|--------------------------------------------|-------------------------------------------------------------------------|------------------------------------------------------------|------|
| <b>Regulation of metabolite levels</b>               | Ptp-Fe                                               | O <sub>2</sub> -derived ROS                | PDT                                                                     | murine colon cancer and breast tumors                      | 135  |
|                                                      | PEBVO@PEG NRs                                        | O <sub>2</sub> -derived ROS                | SDT                                                                     | breast cancer                                              | 150  |
|                                                      | IL-LM-ZrO <sub>2</sub>                               | O <sub>2</sub> -derived ROS                | MDT                                                                     | murine hepatoma                                            | 154  |
|                                                      | AIE-Au                                               | O <sub>2</sub> -derived ROS                | RDT and RT                                                              | glioblastoma, hepatocellular carcinoma and prostate cancer | 158  |
|                                                      | PFV-L@PEG-FA-NPs                                     | O <sub>2</sub> -derived ROS                | CL-PDT                                                                  | breast cancer                                              | 167  |
|                                                      | SiO <sub>2</sub> -MB@MnO                             | H <sub>2</sub> O <sub>2</sub> -derived ROS | O <sub>2</sub> self-supplied PDT                                        | cervical cancer                                            | 194  |
|                                                      | Fe@Fe <sub>3</sub> O <sub>4</sub> -Cu <sub>2</sub> O | H <sub>2</sub> O <sub>2</sub> -derived ROS | CDT                                                                     | breast cancer                                              | 209  |
|                                                      | Cu-TCPP MOFs                                         | H <sub>2</sub> O <sub>2</sub> -derived ROS | CDT                                                                     | cervical cancer                                            | 228  |
|                                                      | InN@In <sub>2</sub> S <sub>3</sub> nanorod           | H <sub>2</sub> O-derived ROS               | O <sub>2</sub> self-supplied PDT                                        | glioblastoma                                               | 231  |
|                                                      | Hf-TP-SN                                             | H <sub>2</sub> O-derived ROS               | RT and chemotherapy                                                     | colon cancer and breast cancer                             | 245  |
|                                                      | W <sub>18</sub> O <sub>49-x</sub> nanobrush          | H <sub>2</sub> O-derived ROS               | SDT                                                                     | breast cancer                                              | 246  |
|                                                      | Pt NPs                                               | H <sub>2</sub> O-derived ROS               | EDT                                                                     | breast cancer                                              | 255  |
|                                                      | CoFe <sub>2</sub> O <sub>4</sub> -BiFeO <sub>3</sub> | H <sub>2</sub> O-derived ROS               | MEDT                                                                    | breast cancer                                              | 256  |
|                                                      | HSA-Ce6-CuO <sub>2</sub>                             | organic lipid hydroperoxides-derived ROS   | O <sub>2</sub> /H <sub>2</sub> O <sub>2</sub> self-supplied CDT and PDT | breast cancer                                              | 264  |
|                                                      | IO-LAHP NPs                                          | Inorganic metal peroxides-derived ROS      | Oxidation therapy                                                       | glioblastoma                                               | 267  |
|                                                      | FeAl-LDH@DHA                                         | small molecule donor-derived ROS           | CDT and chemotherapy                                                    | breast cancer                                              | 272  |
|                                                      | HSCPs                                                | GSH biosynthesis                           | CDT                                                                     | orthotopic murine breast tumors                            | 277  |
|                                                      | BAY-876/V-9302@HSA NPs                               | GSH biosynthesis                           | Oxidation therapy and starvation therapy                                | pancreatic cancer                                          | 284  |
|                                                      | BSO-CAT@MOF-199@DDM                                  | GSH biosynthesis                           | Cuproptosis                                                             | glioblastoma                                               | 296  |
|                                                      | Ce6@RMOF                                             | GSH                                        | GSH depletion-augmented PDT                                             | breast cancer                                              | 304  |
| BEM                                                  | GSH                                                  | CDT                                        | colon cancer and breast cancer                                          | 309                                                        |      |
| SnS <sub>1.68</sub> -WO <sub>2.41</sub> nanocatalyst | GSH                                                  | Hole therapy and gas therapy               | breast cancer                                                           | 311                                                        |      |

|                                         |                                                |                                  |                                      |                   |     |
|-----------------------------------------|------------------------------------------------|----------------------------------|--------------------------------------|-------------------|-----|
| <b>Regulation of enzyme activity</b>    | DHM@RSL3                                       | GSH<br>regeneration and<br>NADPH | Ferroptosis                          | breast cancer     | 338 |
|                                         | SPNA                                           | GSH<br>regeneration              | Chemotherapy                         | hepatoma          | 343 |
|                                         | ArgCCN                                         | RNS                              | Gas therapy                          | breast cancer     | 356 |
|                                         | Lip-DTI/NO NPs                                 | RNS                              | Nitrosative stress,<br>PDT and PTT   | pancreatic cancer | 372 |
|                                         | Ir-N <sub>5</sub> SA                           | NADH                             | Catalytic therapy ;<br>breast cancer | breast cancer     | 384 |
|                                         | PEG-DOX@Cu                                     | Endogenous<br>NOXs               | CDT                                  | glioblastoma      | 395 |
|                                         | Pt+ Hb Hydrogel                                | Endogenous<br>NOXs               | CDT                                  | lung cancer       | 396 |
|                                         | MCRT                                           | Endogenous CAT                   | CDT and gene<br>therapy              | breast cancer     | 407 |
|                                         | cRGD-AuPNSs                                    | Endogenous TrxR                  | Chemotherapy and<br>PTT              | cervical cancer   | 418 |
|                                         | DBCO-8ArmPEG-SS-<br>DHA@RSL3                   | Endogenous<br>GPx4               | Ferroptosis                          | breast cancer     | 427 |
|                                         | TAF-HMON-CuP@PPDG                              | Endogenous<br>GPx4               | CDT                                  | breast cancer     | 428 |
|                                         | PZB@Lip NPs                                    | Endogenous HO-<br>1              | PDT                                  | breast cancer     | 438 |
|                                         | siRNA-ApFe-PLNPs                               | Endogenous<br>MTH1               | CDT                                  | lung cancer       | 445 |
|                                         | Lip-(2DG + Dox)                                | Endogenous HK                    | Chemotherapy                         | cervical cancer   | 456 |
|                                         | DMSN/Fe <sub>3</sub> O <sub>4</sub> -Mn@CB-839 | Endogenous<br>glutaminase        | CDT                                  | colon cancer      | 483 |
|                                         | UCNPs@G4/Ce6/CAT-CTPP                          | Exogenous CAT                    | PDT                                  | breast cancer     | 495 |
|                                         | AG@Cu <sub>9</sub> S <sub>8</sub> @dOMV        | Exogenous GOx                    | CDT , PTT and<br>chemotherapy        | glioblastoma      | 507 |
|                                         | Co-PN <sub>3</sub> SA/CHO                      | Exogenous CHO                    | Catalytic therapy                    | glioblastoma      | 521 |
|                                         | TYR@NPCN-333-APAP                              | Exogenous<br>tyrosinase          | Chemotherapy                         | cervical cancer   | 527 |
|                                         | nHs                                            | Exogenous HRP                    | Chemotherapy                         | cervical cancer   | 530 |
| SOD/CPO-loaded nanogel<br>system (SCNG) | Exogenous SOD<br>and CPO                       | Catalytic therapy                | Hepatocellular<br>carcinoma          | 531               |     |
| GOx/HRP-LNRs                            | Exogenous GOx<br>and HRP                       | Catalytic therapy                | breast cancer                        | 538               |     |
| Hybrid semiconducting<br>nanozyme (HSN) | Nanozyme with<br>POD-like activity             | ferrotherapy and PTT             | breast cancer                        | 560               |     |

|                                        |                                       |                                                                      |                       |               |     |
|----------------------------------------|---------------------------------------|----------------------------------------------------------------------|-----------------------|---------------|-----|
|                                        | FeCo/Fe-Co DAzyme/PL                  | Nanozyme with quadruple enzymatic activity(OXD, GSHOx, CAT, and POD) | Catalytic therapy     | breast cancer | 569 |
| <b>Regulation of signaling pathway</b> | siNrf2-ICG@ZIF-8-DSPE-PEG (RI@Z-P)    | Nrf2                                                                 | PDT                   | melanoma      | 591 |
|                                        | TP/2-DG @HMnO <sub>2</sub> @HA        | Nrf2                                                                 | CDT                   | lung cancer   | 604 |
|                                        | Cu <sub>2-x</sub> Se/ZIF-8@Era-PEG-FA | HIF-1 $\alpha$                                                       | ferroptosis           | breast cancer | 626 |
|                                        | LipoCu-OA/ACF                         | HIF-1                                                                | CDT and immunotherapy | breast cancer | 635 |
|                                        | CeBez                                 | mTOR                                                                 | PDT and chemotherapy  | breast cancer | 647 |
